1 **Quantifying and Mitigating Motor Phenotypes Induced by Antisense Oligonucleotides in the Central**  
2 **Nervous System**

3 Michael P. Moazami,<sup>1,†</sup> Julia M. Rembetsy-Brown,<sup>1,†</sup> Feng Wang,<sup>1</sup> Pranathi Meda Krishnamurthy,<sup>1</sup>  
4 Alexandra Weiss,<sup>2</sup> Miklos Marosfoi,<sup>3</sup> Robert M. King,<sup>3,4</sup> Mona Motwani,<sup>5</sup> Heather Gray-Edwards,<sup>3</sup>  
5 Katherine A. Fitzgerald,<sup>5</sup> Robert H. Brown,<sup>2</sup> Jonathan K. Watts<sup>1,6\*</sup>

6 <sup>1</sup>RNA Therapeutics Institute, University of Massachusetts Medical School, Worcester, MA, 01605 USA;

7 <sup>2</sup>Department of Neurology, University of Massachusetts Medical School, Worcester, MA, 01605 USA;

8 <sup>3</sup>Department of Radiology, UMass Medical School, Worcester, MA, 01605 USA; <sup>4</sup>Department of

9 Biomedical Engineering, Worcester Polytechnic Institute, Worcester, MA, 01609, USA; <sup>5</sup>Program in

10 Innate Immunity, Division of Infectious Diseases and Immunology, Department of Medicine, University

11 of Massachusetts Medical School, Worcester, MA, 01605 USA; <sup>6</sup>Department of Biochemistry and

12 Molecular Pharmacology, University of Massachusetts Medical School, Worcester, MA, 01605 USA

13 \*To whom correspondence should be addressed:

14 Phone, 774-455-3784; Email, [jonathan.watts@umassmed.edu](mailto:jonathan.watts@umassmed.edu)

15 <sup>†</sup>These authors contributed equally to the work

16

17 **ABSTRACT**

18 Antisense oligonucleotides (ASOs) are emerging as a promising class of therapeutics for neurological

19 diseases. When injected directly into the cerebrospinal fluid, ASOs distribute broadly across brain

20 regions and exert long-lasting therapeutic effects. However, many phosphorothioate (PS)-modified

21 gapmer ASOs show transient motor phenotypes when injected into the cerebrospinal fluid, ranging from

22 reduced motor activity to ataxia or acute seizure-like phenotypes. The effect of sugar and phosphate

23 modifications on these phenotypes has not previously been systematically studied. Using a behavioral

24 scoring assay customized to reflect the timing and nature of these effects, we show that both sugar and

25 phosphate modifications influence acute motor phenotypes. Among sugar analogues, PS-DNA induces

26 the strongest motor phenotype while 2'-substituted RNA modifications improve the tolerability of PS-

27 ASOs. This helps explain why gapmer ASOs have been more challenging to develop clinically relative to

28 steric blocker ASOs, which have a reduced tendency to induce these effects. Reducing the PS content of

29 gapmer ASOs, which contain a stretch of PS-DNA, improves their toxicity profile, but in some cases also

30 reduces their efficacy or duration of effect. Reducing PS content improved the acute tolerability of ASOs

31 in both mice and sheep. We show that this acute toxicity is not mediated by the major nucleic acid

32 sensing innate immune pathways. Formulating ASOs with calcium ions before injecting into the CNS  
33 further improved their tolerability, but through a mechanism at least partially distinct from the  
34 reduction of PS content. Overall, our work identifies and quantifies an understudied aspect of  
35 oligonucleotide toxicology in the CNS, explores its mechanism, and presents platform-level medicinal  
36 chemistry approaches that improve tolerability of this class of compounds.

37

## 38 INTRODUCTION

39 Antisense oligonucleotides (ASOs) are emerging as a promising class of therapeutics for neurological  
40 diseases.<sup>1-4</sup> The groundbreaking ASO nusinersen was approved by the FDA in 2016 to treat spinal  
41 muscular atrophy.<sup>5-12</sup> Nusinersen operates through a splice-switching mechanism and is fully modified  
42 with 2'-O-methoxyethyl sugars and phosphorothioate linkages. Nusinersen showed an excellent safety  
43 and efficacy profile in clinical trials. Another class of ASOs is designed to recruit RNase H to cleave target  
44 RNA and thus silence gene expression. These so-called gapmer ASOs require a stretch (“gap”) of 8-10  
45 non-sugar-modified DNA nucleotides in the middle to enable RNase H recruitment. In contrast to  
46 nusinersen, early clinical evaluation of gapmer ASOs in the CNS faced dose-limiting toxicity resulting in  
47 failed clinical trials. Nevertheless, after these false starts, a more advanced generation of gapmer ASOs  
48 are in clinical development for neurological diseases including Huntington’s disease,<sup>13-15</sup> Alzheimer’s  
49 disease,<sup>16</sup> Parkinson’s disease,<sup>17</sup> and amyotrophic lateral sclerosis (ALS).<sup>4, 18-20</sup> These compounds show  
50 promising biomarker efficacy with reasonable toxicity profiles.

51 Looking at the chemical modification patterns used in early clinical trials vs RNase H-active compounds  
52 currently in the clinic, a major difference is the number of PS backbone modifications. In early trials,  
53 gapmer ASOs were fully PS modified (similar to nusinersen), while current variants of the compounds  
54 use a mixed backbone where up to six linkages are substituted back to phosphodiester. In parallel in our  
55 own work, during the development of gapmer ASOs for *C9ORF72*-driven ALS,<sup>21</sup> we observed a range of  
56 transient motor phenotypes most severe within the first 1-3 hours after intracerebroventricular  
57 administration of the ASOs to mice. We were able to reduce these effects by reducing the backbone PS  
58 content. We carried out the current study to explore the generality of this phenomenon, explore its  
59 mechanism, and understand how it is affected by chemical modifications to both phosphates and  
60 sugars.

61 Using a quantitative scoring assay for ASO-induced motor phenotypes, we now show that the acute  
62 motor phenotypes produced by PS-modified gapmer ASOs in the brain can be minimized by using ASOs  
63 containing a combination of phosphorothioate (PS) and unmodified phosphodiester (PO) linkages.  
64 Interestingly, the ASO-induced motor phenotypes are profoundly affected by the sugar modifications  
65 used: PS-DNA ASOs were the most toxic, while ASOs composed entirely of 2'-O-substituted RNA (2'-O-  
66 methoxyethyl or 2'-O-methyl RNA) were less toxic.

67 We also now present experimental results that shed light on the mechanism underlying the observed  
68 motor phenotypes. We show that they are not mediated by the major nucleic acid sensing innate  
69 immune pathways, do not produce long-term toxicity and are observed in both small (mouse) and large  
70 (sheep) brains. The toxicity profile of *both* fully PS and mixed-backbone (PO/PS) ASOs can be improved  
71 by exposing ASOs to calcium-containing buffers before injection, indicating that PS-modified  
72 oligonucleotides induce a local CSF disbalance in divalent ion composition. Finally, we show that mixed  
73 (PO/PS) backbone ASOs with *in vivo* gene silencing efficacy comparable with full PS ASOs can be  
74 engineered, defining the clear steps towards development of highly active and safe ASOs for other  
75 neurodegenerative disorders.

76 Progress in chemical modification of oligonucleotides has been profoundly important in enabling clinical  
77 success.<sup>22-24</sup> Further improvements in modification and formulation of ASOs, as well as increased  
78 mechanistic understanding of the factors defining efficacy and toxicity, is essential to expand the  
79 therapeutic use of gapmer ASOs in the CNS.

## 80 **RESULTS**

### 81 **EvADINT scoring assay for acute behavioral toxicity**

82 After administration of ASOs into the CNS, we observed dose-dependent acute behavioral toxicity that  
83 varied from lethargy, lack of responsiveness and ataxia to hyperactivity, seizures, and, in extreme cases,  
84 death. This behavioral neurotoxicity was most striking in the first 1-3 hours after administration. Even  
85 severely affected mice, unless they died, recovered fully by 24h and showed no further adverse effects.  
86 To describe our studies of acute toxicity in a robust way, we needed a way to quantify this acute toxicity.  
87 Various protocols have been used to quantitate behavioral toxicity under the umbrella of a “Functional  
88 Observational Battery” (FOB), with variations for both acute and longitudinal neurotoxicity (reviewed in  
89 ref<sup>25</sup>. Regulatory documents such as the OECD guideline for neurotoxicity testing in rodents<sup>26</sup> do not

90 provide assay details that are well aligned with the transient toxicity seen after ASO administration to  
91 mice.

92 We therefore developed a scoring assay optimized to quantify the transient motor phenotypes induced  
93 after intracerebral oligonucleotide injection. We call this assay EvADINT (Evaluation of Acute Drug-  
94 Induced NeuroToxicity). In this assay, we monitored mice at multiple time points over 24 hours after  
95 injection, assigning a score for various parameters as described in Table 1. If a mouse died, it was given a  
96 score of 75. Seizures, hyperactivity and other atypical motor behavior were scored depending on their  
97 severity. The rest of the score was allotted based on how much time elapsed before the animal was able  
98 to resume various aspects of normal mouse behavior. We weighted the observed phenotypes according  
99 to their apparent severity. For example, sternal posture was weighted more heavily than normal  
100 grooming since mice must be able to right themselves to carry out most other aspects of normal mouse  
101 behavior, and because maintenance of sternal posture is simpler than eating, walking or grooming. For  
102 similar intuitive reasons, seizures and death were weighted more heavily than the other factors such as  
103 latency to resume normal mouse behavior(s). We varied the relative weightings of different factors in  
104 our assay – death, seizures, and the various other behavioral observations – and observed that the  
105 relative scores of different ASOs were very similar in all cases. Thus, the EvADINT scoring assay is robust  
106 to variation in the precise weights assigned to each factor.

| Behavioral element / observation                            | 75     |          |      |        |       |
|-------------------------------------------------------------|--------|----------|------|--------|-------|
|                                                             | Severe | Moderate | Mild | Absent |       |
| Death                                                       |        |          |      |        |       |
| Seizure <sup>a</sup>                                        | 20     | 15       | 10   | 0      |       |
| Hyperactivity or other atypical motor behavior <sup>b</sup> | 15     | 10       | 5    | 0      |       |
| Time required for:                                          | 0.5 h  | 1 h      | 2 h  | 4 h    | ≥24 h |
| Maintenance of sternal posture                              | 0      | 4        | 8    | 12     | 20    |
| Unstimulated movement                                       | 0      | 3        | 6    | 9      | 15    |
| Movement without ataxia                                     | 0      | 2        | 4    | 6      | 10    |
| Normal grooming/eating/nesting                              | 0      | 1        | 2    | 3      | 5     |

107  
108 **Table 1.** Breakdown of scoring for the EvADINT system for quantification of acute motor phenotypes. Examples of observed  
109 phenotypes (movies and corresponding scores), and all actual mouse scores for all figures are given in the supporting  
110 information. Personnel were blinded to ASO group during the scoring. <sup>a</sup>Severity of seizures was ranked as follows: A *severe*  
111 seizure had a duration of >30min and/or with constant or high intensity muscle contractions. A *moderate* seizure had a 10-30  
112 min duration and moderate intensity muscle contractions or rapid and repetitive synchronous twitching, accompanied by  
113 apparent short-term loss of consciousness. A *mild* seizure lasted <10min and featured low intensity muscle contractions or  
114 short & infrequent bursts. <sup>b</sup>Severity of hyperactivity or other atypical motor behavior was ranked as follows. Severe: >30min

115 duration, popcorning/jumping, constant. Moderate: 10-30min duration, slight hopping, other atypical motor behavior. Mild:  
116 <10min duration, uncoordinated movements, twitching.

117

## 118 **Reduced phosphorothioate content and formulation with Ca<sup>2+</sup> reduces acute toxicity**

119 In our parallel work on the development of ASOs that target the sense and antisense transcripts from  
120 the ALS/FTD gene *C9ORF72*, we found that reducing the number of phosphorothioate-modified linkages  
121 between pairs of 2'-*O*-methoxyethyl (MOE)-modified ribonucleotides improved tolerability without loss  
122 of efficacy or duration of effect.<sup>21</sup> A similar mixed backbone design is now in clinical development.<sup>15</sup>  
123 Thus our lead backbone design, and the mixed backbone design that we focus on exclusively in this  
124 study, contains a single PS linkage at each end of the ASO, followed by three PO linkages and then PS  
125 linkages throughout the remaining (central) portion of the ASO (sequences and modification patterns  
126 are shown in Table 2). With the EvADINT scoring system established, we set out to quantify this  
127 observation and explore its generality and mechanism. We first established that our previous result was  
128 reproducible under quantitative, blinded conditions. Thus, reducing the phosphorothioate content of a  
129 *C9ORF72*-targeted ASO led to increased tolerability in the CNS (Figure 1A).

130 Phosphorothioate groups are more acidic than phosphates, and thus more anionic at physiological pH,  
131 and a greater share of the negative charge is concentrated on the sulfur atom. We wondered whether  
132 the more anionic character of phosphorothioate-modified ASOs was increasing their tendency to chelate  
133 divalent cations from CSF. During ICV injections, to keep volumes small, the ASO concentration is high  
134 (typically 1-4 mM). This is comparable to or higher than the concentration of Ca<sup>2+</sup> in CSF, which is 1.3–  
135 1.4 mM<sup>27</sup> – and moreover, each polyanionic ASO could potentially chelate multiple Ca<sup>2+</sup> ions. We  
136 wondered whether reducing the PS content of our ASOs was reducing toxicity simply by reducing their  
137 tendency to chelate Ca<sup>2+</sup> ions.

138 To explore whether the neurotoxicity we observed could be explained by Ca<sup>2+</sup> chelation, we tested ASOs  
139 that had been pre-saturated with Ca<sup>2+</sup> before injection. We chose this pre-saturation approach because  
140 we did not know exactly how much Ca<sup>2+</sup> each ASO would chelate from the solution. We were concerned  
141 that if we simply suspended our ASOs in buffer containing a physiological concentration of Ca<sup>2+</sup>, it might  
142 be insufficient to compensate for the chelation abilities of ASOs at these high concentrations. And on  
143 the other hand, we were concerned that injecting ASOs in buffer containing higher-than-physiological  
144 concentrations of Ca<sup>2+</sup> might lead to hypercalcemia-mediated toxicity. Thus, after HPLC purification of

145 ASOs, we transferred each ASO to a 3kDa-cutoff Amicon ultrafiltration cartridge, and washed with a  
146 solution containing 20 mM Ca<sup>2+</sup>, twice with water, and once with PBS.<sup>28</sup> We then resuspended the ASO  
147 in PBS and proceeded to injection. The intervening water washes are important to prevent the  
148 irreversible precipitation of calcium phosphate resulting from excess Ca<sup>2+</sup> in the presence of phosphate  
149 buffer.

150 For this study, we chose a moderately high dose of 35 nmol ASO per mouse (equivalent to about  
151 10mg/kg), somewhat higher than the dose typically required for effective gene silencing. Under these  
152 conditions, for our *C9ORF72*-targeted ASO, we observed that pre-saturation with Ca<sup>2+</sup> led to a robust  
153 improvement in acute tolerability in the CNS (Figure 1A). Interestingly, the improvement in tolerability  
154 occurred for both the full PS and the mixed backbone ASOs. Thus, the best-tolerated ASO was the  
155 compound with reduced PS content and which had also been pre-saturated with Ca<sup>2+</sup>.

156 These *C9ORF72* ASOs targeted the human transcript; the acute motor phenotypes were observed  
157 whether the ASOs had a target (as in the transgenic *C9ORF72* mouse models we used in the parallel  
158 work on therapeutic development for *C9ORF72*)<sup>21</sup> or not (as in the wild type mice used here).

159 To test whether these principles applied to other targeting and non-targeting sequences, we synthesized  
160 ASOs targeting the noncoding RNA *Malat1* and the Huntingtin (*Htt*) mRNA (Sequences 6–9, Table 2). We  
161 synthesized versions of these sequences in both full PS and mixed backbone formats, and in all cases  
162 compared simple formulation in PBS with formulation in PBS after calcium pre-saturation. We injected  
163 these compounds into mice (ICV) and observed motor phenotypes using the EvADINT assay (Figure 1B-  
164 C). For the *Malat1*-targeting ASO (Figure 1B), we saw the same pattern as for the *C9ORF72*-targeted  
165 ASO – namely, there was a substantial improvement in tolerability upon reducing the PS content, and  
166 both the full PS and mixed backbone ASOs showed further improvement upon formulation with Ca<sup>2+</sup>.

167 For the *Htt*-targeted ASO, we saw higher toxicity and broader variability in tolerability across the groups  
168 (Figure 1C). The improvement in tolerability of this mixed-backbone design was less clear than for the  
169 other sequences. However, the improvement in tolerability from Ca<sup>2+</sup> formulation was robust in the  
170 context of both backbone variants. Thus, there may be a sequence-dependence to optimal backbone  
171 design, and it is clear that reducing the PS content in this way does not reduce the need to select good  
172 sequences.

173 Finally, we synthesized non-targeting control ASOs (Sequences 10 and 11, Table 2) and formulated them  
174 in the same way as the first three sequences. We injected these ASOs into mice and scored neurotoxicity

175 using the EvADINT assay (Figure 1D). The patterns observed for this sequence are slightly different – in  
 176 this case, calcium formulation had little or no effect on toxicity, while the reduction of PS content  
 177 showed a dramatic improvement in toxicity.

178 Thus, each of the four sequences we tested showed a robust improvement in toxicity following a  
 179 modest reduction in PS content, Ca<sup>2+</sup> formulation, or both. The ASO-induced motor phenotypes were  
 180 dose dependent across multiple sequences and design patterns (Supporting Figure S1). It is interesting  
 181 that across all sequences, higher toxicity was often accompanied with higher inter-animal variability.  
 182 That is, there appear to be important animal-to-animal variations in the actualization of this toxicity.

183

184

| Seq # | Name            | Sequence and modification pattern                                                                                     | Mass calculated | Mass observed |
|-------|-----------------|-----------------------------------------------------------------------------------------------------------------------|-----------------|---------------|
| 1     | C9ORF72-full PS | GsCsCsCsTsAsGsCsGsCsGsGsGsAsCsTsC                                                                                     | 6560.6          | 6560.0        |
| 2     | C9ORF72-PS/PO   | GsC <sub>o</sub> C <sub>o</sub> C <sub>o</sub> CsTsAsGsCsGsCsGsCsGsGsGsAsCsTsC                                        | 6465.6          | 6465.2        |
| 3     | C9ORF72-DNA+PS  | GsCsCsCsCsTsAsGsCsGsCsGsCsGsGsAsCsTsC                                                                                 | 5820.8          | 5820.6        |
| 4     | C9ORF72-MOE+PS  | GsCsCsCsCsTsAsGsCsGsCsGsCsGsGsAsCsTsC                                                                                 | 7153.3          | 7154.3        |
| 5     | C9ORF72-OMe+PS  | GsCsCsCsCsTsAsGsCsGsCsGsCsGsGsAsCsTsC                                                                                 | 6332.0          | 6332.8        |
| 6     | MALAT1-full PS  | GsGsGsTsCsAsGsCsTsGsCsCsAsAsTsGsCsTsAsG                                                                               | 7232.1          | 7231.9        |
| 7     | MALAT1-PS/PO    | GsG <sub>o</sub> G <sub>o</sub> T <sub>o</sub> CsAsGsCsTsGsCsCsAsAsTsG <sub>o</sub> C <sub>o</sub> T <sub>o</sub> AsG | 7136.3          | 7135.2        |
| 8     | HTT-full PS     | CsTsCsGsAsCsTsAsAsAsGsCsAsGsGsAsTsTsTsC                                                                               | 7217.1          | 7216.8        |
| 9     | HTT-PS/PO       | CsT <sub>o</sub> C <sub>o</sub> G <sub>o</sub> AsCsTsAsAsAsGsCsAsGsGsAsT <sub>o</sub> T <sub>o</sub> TsC              | 7120.7          | 7120.0        |
| 10    | NTC-full PS     | CsCsTsAsTsAsGsGsAsCsTsAsTsCsCsAsGsGsAsA                                                                               | 7184.1          | 7184.0        |
| 11    | NTC-PS/PO       | CsC <sub>o</sub> T <sub>o</sub> A <sub>o</sub> TsAsGsGsAsCsTsAsTsCsCsA <sub>o</sub> G <sub>o</sub> G <sub>o</sub> AsA | 7088.1          | 7087.1        |

185 **Table 2.** Sequences used in this study. Bold blue: MOE. Bold green: 2'-OMe. Black: DNA. Lower case  
 186 letters s and o refer to phosphorothioate and phosphodiester linkages, respectively. NTC: non-target  
 187 control ASO.

188

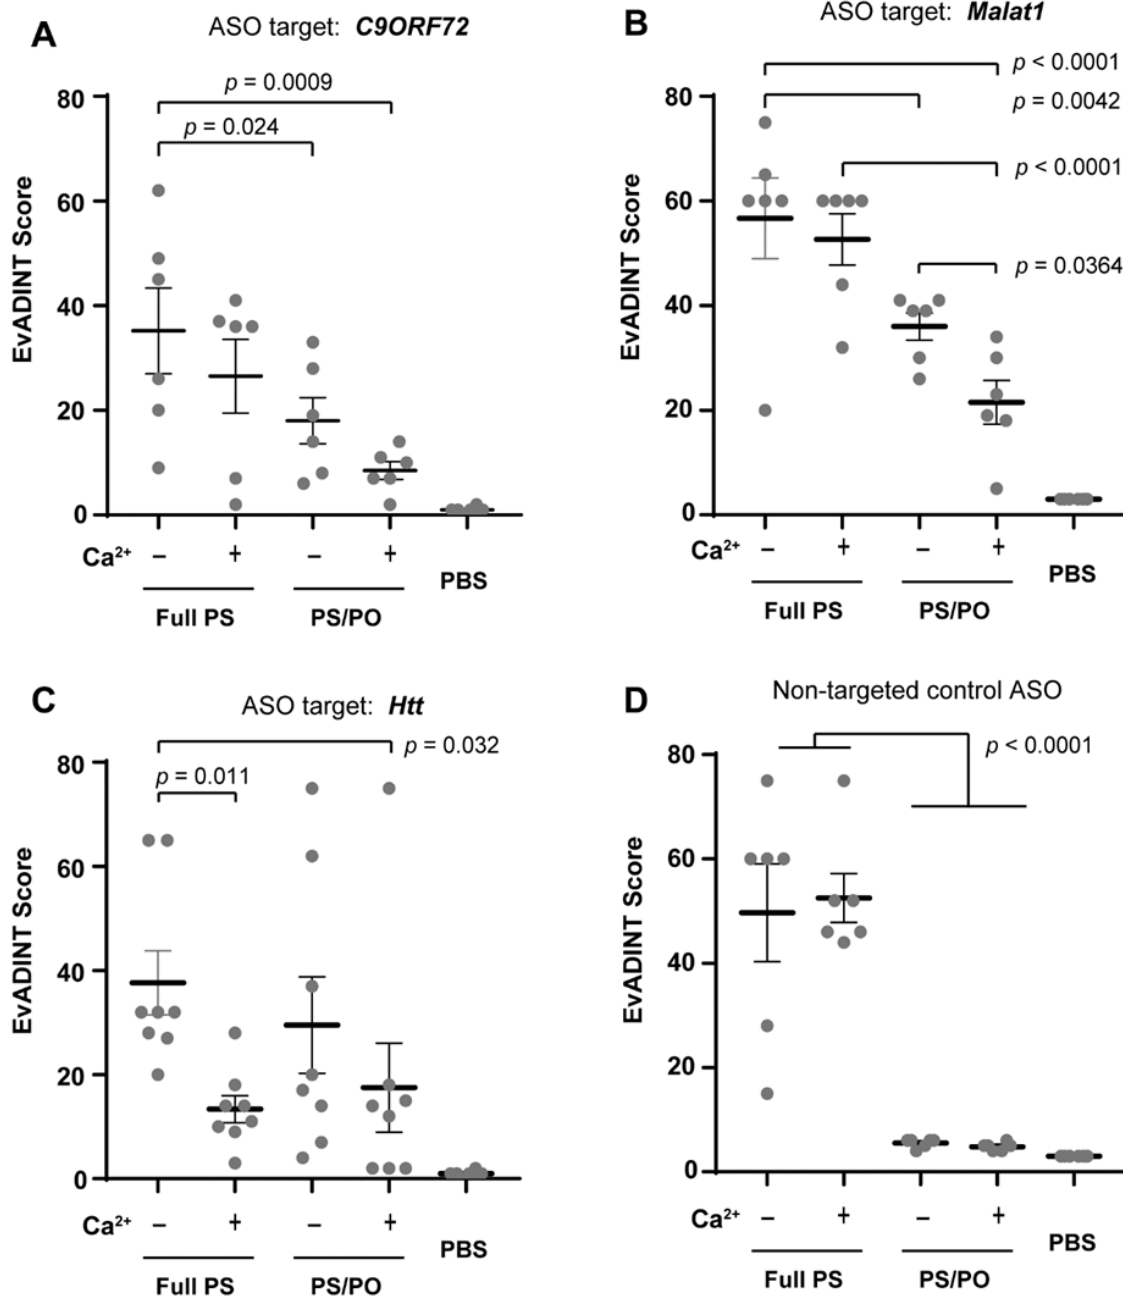

189

190 **Figure 1.** The tolerability of ASOs administered into the CNS is improved by modestly reducing the backbone PS  
 191 content and by formulating with Ca<sup>2+</sup> ions before injecting. Mice were injected ICV with 35 nmol of each ASO in 10  
 192  $\mu$ L PBS (or with 10  $\mu$ L PBS as control) and behavior was scored by a blinded investigator over the following 24h  
 193 using the EvADINT rubric. Sequences targeting (A) *C9ORF72*, (B) *Malat1*, or (C) *Htt*, or (D) a non-targeting control  
 194 ASO, showed improvements in acute tolerability upon reducing the PS content, formulating with Ca<sup>2+</sup> ions, or both.  
 195 Each data point represents the EvADINT score from one mouse; n = 6–8; error bars represent SEM. P-values are  
 196 calculated using one-way ANOVA within GraphPad Prism software and represent per-comparison error rates. Full  
 197 sequences and modification patterns are given in Table 2.

198



## 199 Sugar 2'-modifications reduce acute motor phenotypes

200 Nusinersen, approved to treat spinal muscular atrophy,<sup>9-12</sup> contains a fully phosphorothioate backbone.  
201 Yet it is well tolerated in the CNS<sup>8</sup> and has received FDA approval.<sup>5, 6</sup> This compound is modified at each  
202 nucleotide with MOE; it is not a gapmer and does not require a stretch of DNA because it functions to  
203 redirect splicing rather than recruiting RNase H. We therefore wondered whether fully-  
204 phosphorothioate-modified ASOs containing different sugar modifications might show acute motor  
205 phenotypes to a different extent.

206 To study this question, we synthesized fully-phosphorothioate ASOs modified *at every nucleotide* with  
207 DNA, 2'-O-methyl RNA, or MOE, respectively (in contrast to the gapmer designs used in Figure 1). We  
208 suspended these in PBS, injected them ICV at 35 nmol/mouse and scored acute motor phenotypes using  
209 the EvADINT assay. The fully DNA oligonucleotide **3** was dramatically more toxic than the two  
210 oligonucleotides containing 2'-modifications at every nucleotide (**4** and **5**; Figure 2). The two 2'-modified  
211 versions showed a dramatic reduction in motor phenotypes. We also carried out the comparison of full  
212 MOE with full DNA for a sequence targeting Malat1 and saw the same dramatic difference in toxicity  
213 (data not shown: the Malat1 experiment was carried out before we had established the quantitative  
214 EvADINT assay, but the clear difference we observed strongly suggests that the impact of sugar  
215 modification on toxicity is not sequence specific.)

216

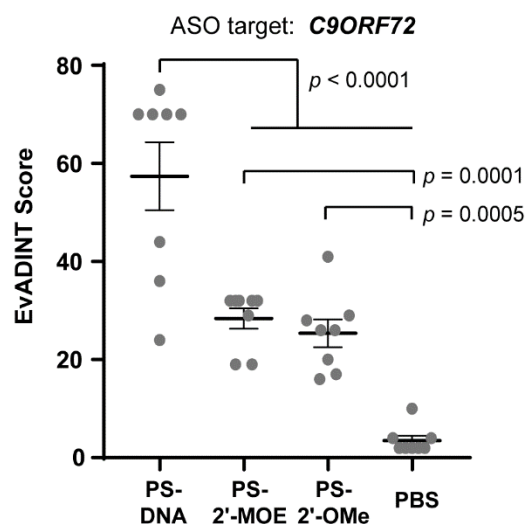

217

218 **Figure 2.** Fully PS ASOs containing 2'-modifications at each position are less toxic than those containing DNA at  
219 each position. We injected 35 nmol of each ASO in PBS to the right lateral ventricle of mice, and recorded  
220 behavioral outcomes according to the EvADINT rubric. Each data point represents the EvADINT score from one

221 mouse; n = 8; error bars represent SEM. P-values are calculated using one-way ANOVA within GraphPad Prism  
222 software and represent per-comparison error rates. Full sequences and modification patterns are given in Table 2.

223

224 **PS-ASO-induced acute neurotoxicity is not mediated by the major nucleic acid sensing innate immune**  
225 **pathways**

226 The acute toxicity we observe is most intense in the first hour after injection of mice. This timing  
227 suggested to us that the acute toxicity is not mediated by the innate immune system, since innate  
228 immune responses to nucleic acid stimuli typically do not peak until several hours after stimulation.<sup>29, 30</sup>

229 To confirm in a more direct way whether innate immune responses could play a role, we directly  
230 evaluated whether there was any contribution to this neurotoxicity from signaling through Toll-like  
231 receptors (TLRs) 3, 7, or 9, or the CGAS-STING pathway. First, we evaluated mouse behavior after  
232 injecting a 50 µg dose of poly(I:C), a compound and dose known to induce potent innate immune  
233 stimulation through TLR3 or MDA-5.<sup>29,31</sup> Mice treated with poly(I:C) showed no evidence of the acute  
234 motor phenotypes seen with PS-modified ASOs, with EvADINT scores comparable to the buffer-only  
235 control mice (Figure 3A).

236 We also evaluated the role of other endosomal receptors TLRs 7 and 9 as well as the cytosolic DNA  
237 sensing cGAS-STING pathway by obtaining mice lacking both MyD88 and STING (Myd88<sup>-/-</sup> STING<sup>-/-</sup> double  
238 knockout mouse). This strain lacks signaling components for both endosomal as well as cytosolic nucleic  
239 acid sensing pathways. TLRs 7 and 9 signal through MyD88, whereas STING functions downstream of  
240 cGAS following cytosolic DNA sensing. Injection of a PS-DNA ASO into these double knockout mice  
241 showed an identical response relative to a background-matched control mouse, confirming that the  
242 toxicity is not mediated by any of these nucleic acid sensors (Figure 3B).

243 Taken together, these experiments provide evidence that the acute toxicity which is the focus of this  
244 work is not mediated by the major nucleic acid sensing innate immune pathways. Of course, this finding  
245 does not preclude a role for other oligonucleotide-induced innate immune responses in the brain at  
246 longer timepoints, as described by other authors.<sup>32</sup>

247

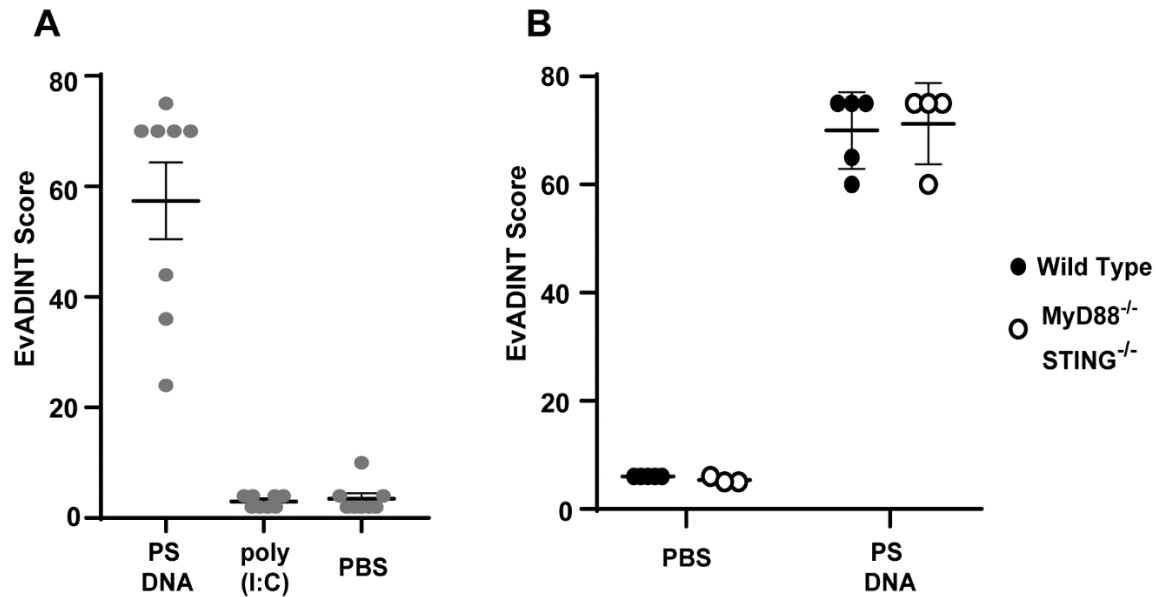

248

249 **Figure 3.** The acute neurotoxicity we observe is not mediated by toll-like receptors 3, 7, or 9, by MDA-5, or by the  
250 cGAS-STING pathway. (A) The highly immunogenic compound poly(I:C) produces none of the behavioral toxicity  
251 seen for the PS-containing ASOs after ICV injection, showing that the toxicity is not signaling through TLR3 or MDA-  
252 5. We injected 35 nmol of PS-DNA or 50  $\mu$ g of poly(I:C) in PBS to the right lateral ventricle of mice, and recorded  
253 behavioral outcomes according to the EvADINT rubric. (B) Double knockout MyD88<sup>-/-</sup> STING<sup>-/-</sup> mice (hollow dots)  
254 show an identical response to wild type mice (filled dots), showing that the acute toxicity is not mediated by TLR7,  
255 TLR9 or the CGAS-STING pathway. In both panels, each data point represents the EvADINT score from one mouse;  
256 error bars represent SEM. All PS-DNA samples were significantly different from all other samples in both panels  
257 (One-way ANOVA,  $p < 0.0001$ ). Full sequences and modification patterns are given in Table 2.

258

259

260 **The improved tolerability of mixed backbone ASOs applies to large brains**

261 We wondered whether the acute toxicity we observed was an artifact of the small brain size of mice.  
262 This would make the concern significantly less relevant to researchers interested in therapeutic  
263 development of ASOs. To test whether the phenomenon applied to larger brains, we injected two  
264 sheep with fully phosphorothioate ASO (C9ORF72-full PS, Sequence 1), and four sheep with the mixed  
265 backbone analogue of the same sequence (C9ORF72-PS/PO, Sequence 2).

266 Direct intrathecal injection, the route used for patients receiving ASO therapeutics, is not practical in  
267 sheep because of difficulty accessing the intrathecal compartment and because CSF tends to be expelled  
268 from the site where the dura is punctured, leading to poor uptake of ASO. Therefore, we used a  
269 technique whereby a microcatheter was threaded up through the intrathecal space and the ASO was  
270 delivered directly into the cisterna magna (see Methods). In all cases successful microcatheter  
271 navigation was performed into cisterna magna. Both intracisternal contrast injection and cone beam  
272 computed tomography confirmed the correct catheter position prior to ASO injection. Contrast material  
273 opacification was seen in the cisterna magna, around the cerebellum and in the upper cervical spinal  
274 canal. No complication was observed in relation to catheter navigation or contrast injection.

275 None of the four sheep that were given the mixed backbone ASO (C9ORF72-PS/PO, Sequence 2) showed  
276 evidence of abnormal motor phenotypes. In contrast, both sheep that were given fully  
277 phosphorothioate ASO (C9ORF72-full PS, Sequence 1) showed hindlimb weakness and gait instability  
278 (wobbliness) within the first 24 hours. Thus, the acute toxicity of fully phosphorothioate ASOs is not  
279 specific to mice but also applies to large brains. The ASOs were given in Lactated Ringer's solution, a  
280 calcium-containing diluent readily available at USP-grade, which confirms that the toxicity improvement  
281 mediated by reducing PS content is at least partly distinct from the question of Ca<sup>2+</sup> chelation, in larger  
282 brains (in this case, sheep) as in mice as described above.

283

284 **Impact on efficacy of reducing phosphorothioate content and Ca<sup>2+</sup> formulation**

285 We previously observed for C9ORF72-targeted ASOs that the mixed backbone strategy did not reduce  
286 potency or efficacy as long as the phosphodiester linkages were between MOE nucleotides on both  
287 sides. In contrast, when we modified the linkage between a MOE nucleotide and a deoxynucleotide, the  
288 potency dropped dramatically.<sup>21</sup> Thus, in this paper we have focused on a single mixed backbone

289 design, in which the three internal linkages in each MOE wing were PO, and all other positions were PS.  
290 To study the effect on efficacy of this backbone design across these sequences, we compared the gene  
291 silencing of ASOs against HTT and MALAT1 in their full PS and mixed backbone versions. To be able to  
292 discriminate between compound efficacy, we chose a non-saturating dose for this element of our study:  
293 we therefore injected 15 nmol of each ASO ICV, and harvested brains after 3 weeks.

294 We found that both HTT and MALAT1-targeted ASOs significantly reduced their target mRNA expression,  
295 but there was a trend to reduced efficacy in mixed backbone format relative to the fully PS analogues  
296 (Figure 4A-B). It is not clear whether this results from a reduction in nuclease stability or a reduction in  
297 cellular uptake, since the PS linkage contributes to both factors. Nevertheless, this finding suggests that  
298 there is merit in exploring alternate backbone architectures, including next-generation mixed backbone  
299 designs,<sup>33</sup> that might allow improvements in acute toxicity while maintaining or improving potency and  
300 efficacy.

301 Next, we tested whether calcium pre-saturation affected ASO efficacy. We prepared ASOs by dissolving  
302 in PBS, either with or without a Ca<sup>2+</sup> pre-saturation step, and injected them ICV into mice. In the context  
303 of either a full PS or mixed PO/PS backbone, we observed that gene silencing efficacy was not affected  
304 by the presence of the Ca<sup>2+</sup> pre-saturation step (Figure 4C).

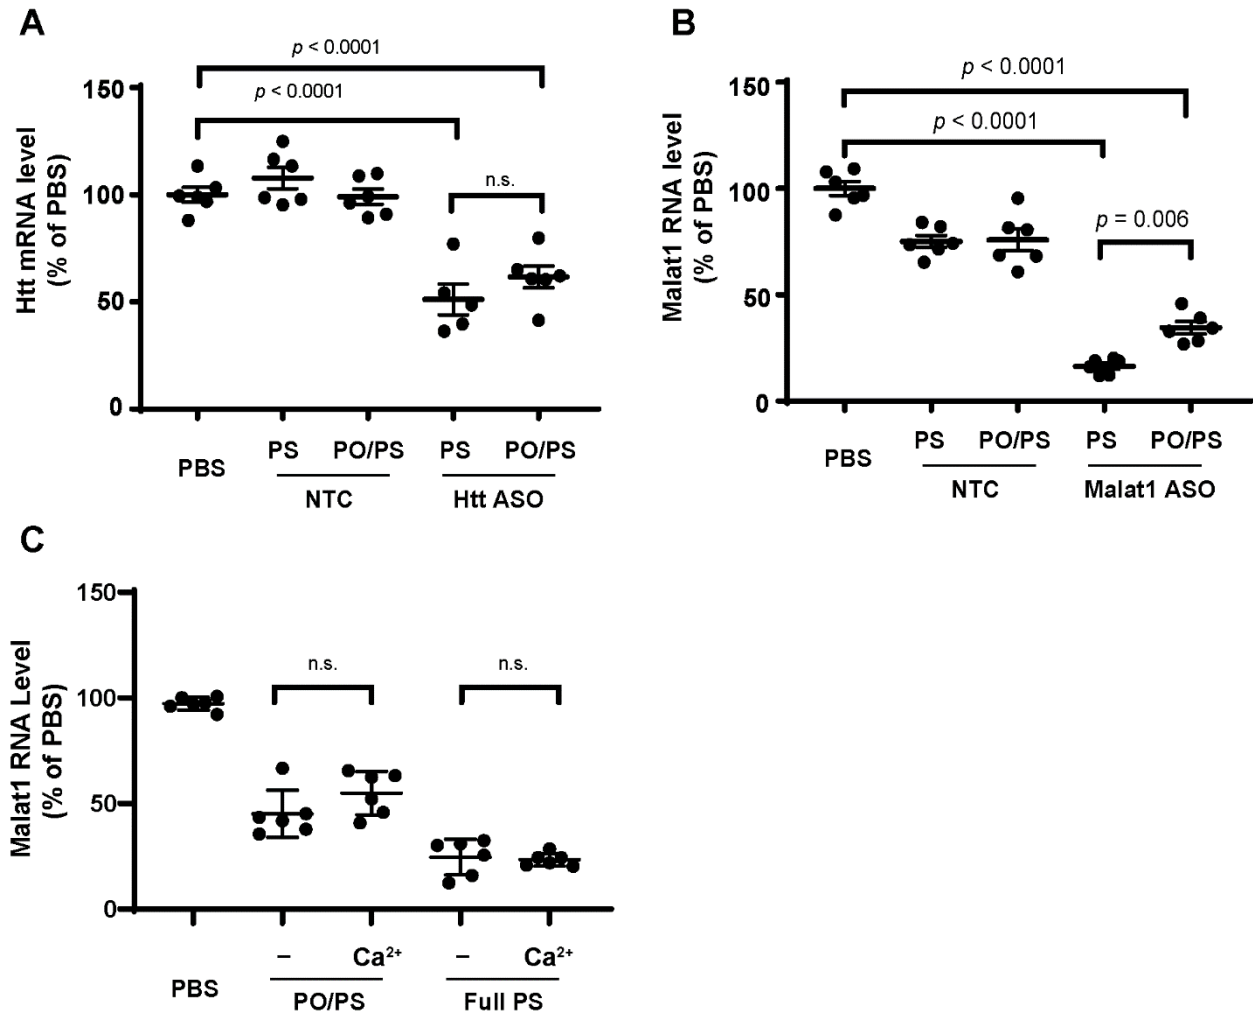

305

306 **Figure 4.** Effect of phosphorothioate reduction and calcium formulation on ASO efficacy. (A,B) Silencing of (A) *Htt*  
307 and (B) *Malat1* RNA three weeks after a 15 nmol dose of either full PS of mixed backbone (PO/PS) ASOs. Each data  
308 point represents one mouse; n=6 mice. (C) Formulation with calcium does not affect the gene silencing efficacy of  
309 ASOs. ASOs were resuspended and delivered in PBS, with or without first saturating the ASOs with calcium (see  
310 methods). In all panels, statistical significance was evaluated by one-way ANOVA followed by Tukey's multiple  
311 comparisons test. Sequence numbers relate to the sequences and modification patterns given in Table 2.

312

## 313 DISCUSSION

314 Over the past few years, an increasing number of papers have described the use of gapmer ASOs in the  
315 CNS. Many of these studies employ ASOs containing full-PS backbones<sup>4, 13, 34-36</sup> or those for which the  
316 modification pattern is not clearly disclosed.<sup>16, 18, 37, 38</sup> Other recent papers do describe ASOs containing  
317 a mixture of PS and PO linkages for use in the CNS.<sup>15, 17, 19, 20, 36, 39-42</sup> However, to the best of our  
318 knowledge, no comparative data on the neurotoxicology of these mixed-backbone ASOs relative to fully-  
319 PS ASOs has been presented, nor has the relationship of sugar modification with acute motor  
320 phenotypes been previously known or the underlying mechanism explored before now.

321 The mechanism for the acute neurotoxicity of PS-modified ASOs is likely multifactorial. We initially  
322 wondered whether the more polyanionic nature of PS linkages was increasing chelation of divalent ions  
323 by ASOs. Since divalent cations, and Ca<sup>2+</sup> in particular, are key for synaptic signaling and  
324 neurotransmission,<sup>43, 44</sup> such depletion of divalent cations from CSF would be expected to produce acute  
325 toxicity that would be expected to last until homeostasis of Ca<sup>2+</sup> concentration in CSF was restored. Ca<sup>2+</sup>  
326 chelation has been responsible for unexpected toxicities in other classes of drugs.<sup>45</sup> Supporting a role  
327 for this mechanism, pre-saturating ASOs with Ca<sup>2+</sup> before injection improved their tolerability. Other  
328 groups have observed ASO-mediated Ca<sup>2+</sup> chelation in cultured neurons.<sup>46</sup> However, mixed backbone  
329 strategies improved toxicity even in the presence of such divalent ions, which suggests that Ca<sup>2+</sup>  
330 chelation cannot fully explain the acute motor phenotypes induced by PS-modified gapmer ASOs.

331 Our experiments document that ASO-induced transient motor phenotypes are not a downstream  
332 consequence of innate immune signaling through the major nucleic-acid-sensing immune pathways.  
333 Treatment with poly(I:C) did not recapitulate the acute toxicity induced by treatment with PS-modified  
334 ASOs, suggesting that the PS-ASO-induced motor phenotypes do not result from TLR3- or MDA-5-  
335 mediated effects. And experiments in Myd88<sup>-/-</sup> STING<sup>-/-</sup> mice confirmed that PS-ASO-induced motor  
336 phenotypes are not mediated by TLR7, TLR9, or cGAS/STING.

337 At least part of the acute neurotoxicity of PS-ASOs is likely to be mediated by protein binding, for  
338 example, to cell surface receptors involved in neuronal signaling. PS-DNA shows extensive binding to a  
339 variety of proteins,<sup>47-50</sup> including cell-surface and trafficking proteins.<sup>51-54</sup> The origins of the high protein  
340 binding of PS-oligos were recently explored with a structural study.<sup>55</sup> After systemic administration, an  
341 earlier generation of mixed-backbone modification ASOs showed reduced binding to proteins such as  
342 complement pathway members and clotting factors.<sup>56-59</sup> An explanation of the acute motor phenotypes

343 related to protein binding is also consistent with the sugar modification data presented above, since PS-  
344 MOE reduces nonspecific protein binding relative to PS-DNA,<sup>60</sup> for example, recent work showed that  
345 PS-MOE bound various plasma proteins with 3 to 50-fold lower affinity relative to PS-DNA.<sup>61</sup> In another  
346 recent study, PS-2'OMe gapmers of two different sequences showed about 2.5-fold lower affinity  
347 protein binding than PS-DNA of the same sequence.<sup>55</sup>

348 The acute motor phenotypes discussed in this work do not appear to be related to other types of ASO-  
349 induce toxicity – such as liver toxicity or immune stimulation. For example, in ongoing work in our  
350 group, we have come across sequences that are well-tolerated in terms of acute motor phenotypes, but  
351 still exhibit liver toxicity, and vice versa. The timing of these effects is also very different: with acute  
352 motor phenotypes strongest in the first hour (perhaps driven by binding to cell-surface receptors as  
353 discussed above), innate immune stimulation peaking at 1-2 days (driven by binding to toll-like receptors  
354 and cytosolic nucleic acid sensors), and liver toxicity evident from 1 day to several days after dosing  
355 (driven by factors including mislocalization of paraspeckle proteins to nucleoli<sup>62</sup>).

356 This paper has focused on a single mixed-backbone design, and the impact of replacing three PS linkages  
357 within each MOE wing with their corresponding (unmodified) PO linkages. It is striking that a relatively  
358 small reduction in PS content makes such a dramatic difference in acute toxicity for multiple sequences.  
359 Our work on *C9ORF72* showed that this design not only maintained but improved potency relative to the  
360 full PS version.<sup>21</sup> Other investigators have also disclosed that some ASOs show increased potency when  
361 a subset of PS linkages are replaced by PO linkages.<sup>63</sup> Nevertheless, this design sometimes leads to a  
362 modest loss in potency, as shown in Figure 4.

363 The well-tolerated nature of fully 2'-modified ASOs in the CNS (Figure 2) has allowed the rapid  
364 development and FDA approval of nusinersen<sup>5-9</sup> as well as the first personalized ASO drug, milasen.<sup>64</sup>  
365 However, recruitment of RNase H requires the presence either of DNA or a DNA analogue, typically as a  
366 gapmer design.<sup>65,66</sup> The fact that PS-DNA shows higher acute toxicity than the corresponding 2'-  
367 modified nucleotides (Figure 2) suggests that a major area of focus for nucleic acid chemists should be  
368 the development of sugar or phosphate-modified DNA analogues that elicit robust RNase H cleavage  
369 while reducing the incidence of motor phenotypes when administered to the CNS. The development of  
370 next-generation mixed-backbone ASOs is an active area of research in our group.<sup>33,67</sup> In the meantime,  
371 researchers can implement mixed backbone designs such as those described here, along with calcium  
372 formulation, to improve the therapeutic index of gapmer ASOs for clinical use in the CNS.

373



## 374 **METHODS**

### 375 **Oligonucleotides**

376 All oligonucleotides were synthesized using ABI 394 or Akta OligoPilot synthesizers using standard  
377 methods. Phosphoramidites were purchased from ChemGenes and diluted to 0.1 M in acetonitrile.  
378 Sulfurization was accomplished using DDTT (0.1M, ChemGenes). Benzylthiotetrazole (0.25 M in  
379 acetonitrile, TEDIA) was used as activator. All cytosine residues were 5-methylcytosine.

380 Oligonucleotides were deprotected by treatment with concentrated aqueous ammonia at 55°C for 16h  
381 then concentrated and purified by ion-exchange HPLC (eluting with 30% acetonitrile in water containing  
382 increasing gradients of NaClO<sub>4</sub>) or ion-pairing reverse-phase HPLC (eluting with aqueous  
383 triethylammonium acetate containing increasing gradients of acetonitrile). All oligonucleotides were  
384 characterized by LCMS.

385 After HPLC purification, we carried out final desalting and buffer equilibration using ultrafiltration  
386 (Amicon centrifugal filters, 3-kDa molecular weight cutoff, Millipore). For oligonucleotides administered  
387 in PBS, we placed the oligonucleotide in the Amicon filter and washed with 2 changes of PBS. To  
388 saturate calcium-binding sites within oligonucleotides, we placed the purified oligonucleotides in the  
389 Amicon filter, washed them twice with a 20 mM solution of CaCl<sub>2</sub>, twice with water, and once with PBS,  
390 before resuspending the ASOs in PBS (Note, in follow up work after the completion of this study, we  
391 found that a lower concentration of CaCl<sub>2</sub> was preferable to minimize compound loss during this wash  
392 step, which is an issue for certain sequences). For the oligonucleotides used for sheep studies, we did  
393 not carry out calcium saturation in this manner but rather resuspended in USP-grade Lactated Ringers  
394 Solution (LRS, which contains 1.3 mM Ca<sup>2+</sup>).

395

### 396 **ICV administration of oligonucleotides in mice**

397 Mouse studies were carried out under UMass Medical School IACUC protocol A-2551. FVB/NCI mice (7-  
398 13 weeks old) were anaesthetized by intraperitoneal injection of fentanyl/midazolam/dexmedetomidine  
399 (0.1, 5, and 0.25 mg/kg, respectively, as a solution in sterile saline). Anaesthetized animals were  
400 transferred to a Kopf small animal stereotaxic frame, ear bars placed and a hand-warmer was placed  
401 underneath the animal to preserve core body-temperature. Ophthalmic lubricant was placed over each  
402 eye and the fur covering the skull was removed. The scalp was aseptically prepared by thorough

403 alternate swabbing with betadine and 70% isopropanol (3x each) and allowed to dry before a medial  
404 incision was made to expose the skull. The periosteum was dried with a sterile cotton swab and the  
405 syringe containing oligonucleotide was moved to bregma. A point was marked on the skull 1 mm  
406 dextralateral and 0.4 mm posterior from bregma and a 0.6–0.8-mm diameter hole drilled at this  
407 location. The tip of the needle was advanced 2 mm ventrally through this hole into the lateral ventricle  
408 and after a 2 minute wait, the oligonucleotide was injected over a period of 25 seconds (10  $\mu$ L total  
409 injection volume). The needle was left in place for 3 minutes post-injection, then removed and the skin  
410 closed with 5-0 vicryl suture. An intraperitoneal injection of flumazenil/atipamezole (0.5 mg/kg and 5  
411 mg/kg respectively, in sterile saline) was used to reverse injected anesthetic agents. Buprenorphine was  
412 also injected for analgesia (0.3 mg/kg, SC). Animals were removed from the stereotaxic frame and  
413 allowed to recover in a warm cage, food and gel were provided, and the animals were observed  
414 periodically over the next 24 hours according to the rubric laid out in Table 1.

415 For ICV injections in the Myd88<sup>-/-</sup> STING<sup>-/-</sup> mice (C57BL/6 background) and corresponding C57BL/6  
416 controls, we used the protocol described above with slightly adjusted coordinates for the ICV injection  
417 (1mm dextralateral, 2mm posterior, 3mm ventral.)

418

#### 419 **STING/MyD88 double knockout mice**

420 Myd88<sup>-/-</sup> mice on C57BL/6 background<sup>68</sup> were obtained from S. Akira (Osaka University, Osaka, Japan).  
421 STING<sup>-/-</sup> mice on C57BL/6 background<sup>69</sup> were originally from G. Barber (University of Miami, Florida) and  
422 obtained from D. Stetson (University of Washington, Seattle). The two strains were intercrossed to  
423 generate Myd88<sup>-/-</sup> STING<sup>-/-</sup> double knockouts. The mice were bred and maintained under pathogen-free  
424 conditions in our animal facility. The Myd88 and STING deficiencies were confirmed by performing PCR  
425 on DNA obtained after digesting a tail snip. For Myd88, specific primer pairs were used to distinguish the  
426 WT or knockout allele in two separate reactions. Reaction 1 with primer sequences AGC CTC TAC ACC  
427 CTT CTC TTC TCC ACA and AGA CAG GCT GAG TGC AAA CTT GTG CTG was used to detect the WT band at  
428 1000 bp and reaction 2 with primer pairs AGC CTC TAC ACC CTT CTC TTC TCC ACA and ATC GCC TTC TAT  
429 CGC CTT CTT GAC GAG were used to detect KO band at 1000 bp. For STING, reaction 1 with primer  
430 sequences AGA ACG GAC AGC CAG TAA GTA TAC AG and CAA TGC TCT CAT AGC CTT CAC TAT C was  
431 used to detect the WT band at 375 bp and reaction 2 with primer pairs AAC TTC CTG ACT AGG GGA GGA  
432 GTA G and CAA TGC TCT CAT AGC CTT CAC TAT C was used to detect the KO band at 470 base pairs.

433

#### 434 **ASO administration in sheep**

435 Sheep studies were carried out under UMass Medical School IACUC protocol A-2593. Jacob sheep were  
436 fasted overnight in preparation for surgery. A 20G catheter was placed and secured in the jugular vein,  
437 blood (5 mL) was drawn from the catheter for analysis, and the catheter was flushed with saline (0.9%  
438 NaCl). We administered buprenorphine (0.01 mg/kg IM), acepromazine (0.05 mg/kg IM) and  
439 glycopyrrolate (0.01 mg/kg IM) 30 min prior to induction of anesthesia. An intravenous cocktail of  
440 ketamine (6 mg/kg) and diazepam (0.3 mg/kg) was administered to induce anesthesia, followed by  
441 ketoprofen (2.2 mg/kg SQ) as analgesic and cefazolin (22 mg/kg IV) to minimize any risk of infection.  
442 The animal was intubated, and a stomach tube was placed to prevent rumen gas pressure build up.  
443 Anesthesia was maintained using vaporized isoflurane (1.5–3.5% in oxygen). Sheep were positioned in  
444 lateral recumbency in an Allura Xper FD20 X-ray system (Philips Medical Systems, Best, Netherlands). A  
445 19-gauge Tuohy needle was inserted in the lumbosacral (L7-S1) intrathecal space and then ~5 mL of CSF  
446 was removed. Using the Touhy needle as entry point, a straight tip microcatheter (Excelsior SL-10;  
447 Stryker Neurovascular) was inserted through the lumen of the needle to access the intrathecal space.  
448 The microcatheter was navigated into the cisterna magna with an assistance of a 0.014" wire under  
449 fluoroscopic guidance. The wire had a slight curve on the tip (Synchro Guidewire, Stryker Neurovascular)  
450 to avoid any nerve or vascular structure damage. A microcatheter contrast injection (1 mL of  
451 Omnipaque 240 mg/ml) was injected and the pattern of contrast material distribution was visualized  
452 prior to the injection of ASO solution (2 mg/kg in ~3 mL of Lactated Ringers Solution; for comparison, the  
453 mouse doses of 15-35 nmol/mouse equate to about 4-10 mg/kg). Cone beam computed tomography  
454 (Allura Xper FD20 X-ray system) imaging was performed to confirm the final microcatheter position in  
455 the cisterna magna in relation to the nerve and vascular structures. At the end of the procedure the  
456 Touhy needle was withdrawn and the microcatheter was removed.

457

#### 458 **EvADINT scoring system for acute neurotoxicity**

459 After ICV administration of ASOs to mice, a blinded investigator ranked the behavior of mice at multiple  
460 timepoints using the rubric laid out in Table 1. If a mouse died within the first 24 hours, its score was  
461 assigned to be 75; otherwise it was the sum of all other scores. Seizures, if observed, were scored based  
462 on severity; hyperactive or spastic behavior was also scored based on severity and included twitching,  
463 uncontrolled movement such as “popcorning” and other atypical motor phenotypes. Besides these  
464 elements, the score was based on the time elapsed until mice resumed normal posture and behavior;

465 for example, if a mouse required more than 1 hour but less than 2 hours to be able to right itself  
466 (resume and maintain sternal posture) it would be given a score of 8. Each mouse was individually  
467 scored. Examples of scoring, with corresponding videos, are provided in Supporting Table S1. The  
468 breakdown of scoring for each mouse is provided in Supporting Tables S2-S7.

469

#### 470 **Evaluation of gene silencing in the CNS**

471 *For comparison of backbones on gene silencing efficacy:* Mice were euthanized at 3 weeks post-  
472 treatment by cervical dislocation and the brain was immediately removed into ice-cold PBS. The brain  
473 was placed in a brain matrix (Braintree scientific) and the most rostral 3 mm discarded. A 1-mm slice was  
474 then taken and each side homogenized independently. The tissue was suspended in Affymetrix  
475 homogenizing solution containing proteinase K and mechanically dissociated using a Qiagen Tissuelyser  
476 with a 2mm tungsten carbide bead. The tubes were then incubated in a water bath at 65 °C until all  
477 tubes appeared transparent. Tubes were centrifuged (16,000 xG, 15 minutes) and supernatant  
478 transferred to a 96 well plate for storage at -80. *Htt*, *Malat1* and *Ppib* RNA levels were quantified using  
479 the QuantiGene 2.0 assay kit (Affymetrix, QS0011) as previously described.<sup>70</sup>

480 *For studying the effect calcium formulation on gene silencing efficacy:* Mice were euthanized at 2 weeks  
481 post-injection via IP administration of 0.1mL of 390 mg/mL pentobarbital sodium and the brain and  
482 spinal cord were immediately removed into ice-cold PBS. A 2mm section of the lumbar spinal cord was  
483 cut and placed in an Eppendorf tube in -80°C. The brain was placed in a brain matrix and the most  
484 rostral 3mm discarded. A 2-mm slice was taken, and the cortical section removed and placed in an  
485 Eppendorf tube in -80°C. Tissue was homogenized in TRI-reagent using a Qiagen TissueLyser and 1 µg of  
486 RNA was reverse transcribed using High-Capacity cDNA Reverse Transcription kit (Life Technologies) per  
487 the manufacturer's protocol. qRT-PCR was carried out using iTaq Supermix (Bio-Rad) on Bio-Rad CFX-96  
488 real time machine using gene-specific primers: *Malat1* Primer1: 5' CTC CAA CAA CCA CTA CTC CAA 3';  
489 Primer2: 5' GTA CTG TTC CAA TCT GCT GCT A 3'; probe: /56-FAM/TCA TAC TCC /ZEN/AGT CGC GTC ACA  
490 ATG C/3IABkFQ/. For *Ppib* (internal control), Primer1: 5'CCG TAG TGC TTC AGC TTG A 3'; Primer2: 5' AGC  
491 AAG TTC CAT CGT GTC ATC 3'; Probe: /56-FAM/TGC TCT TTC /ZEN/CTC CTG TGC CAT CTC /3IABkFQ/.

492

493

494 **SUPPORTING INFORMATION / DATA AVAILABILITY**

495 Supporting information is available in the online version of this file, and includes the following:

496 Supporting Figure S1 shows the dose responsiveness of acute motor phenotypes. Supporting Table S1  
497 and associated movies show examples of mouse phenotypes and corresponding assigned scores. Tables  
498 S2-S10 provide a breakdown of the EvADINT scoring for each mouse and each treatment.

499

500 **ACKNOWLEDGEMENTS**

501 We are grateful to Art Levin for suggesting that we explore the idea of Ca<sup>2+</sup> formulation as a means of  
502 reducing acute neurotoxicity. We thank Nina Bishop, Andrew Coles, Neil Aronin, Miguel Esteves and  
503 Matthew Gounis for help with the sheep study. We thank Anastasia Khvorova for critical feedback on  
504 the manuscript. This work was funded by the Ono Pharmaceutical Foundation (Breakthrough Science  
505 Award to JKW), the Friedreich's Ataxia Research Alliance (Grant to JKW) and the NIH (R01 NS111990 to  
506 RHB and JKW). RHB acknowledges funding from The Angel Fund for ALS Research, ALSOne, ALS Finding  
507 a Cure, the Cellucci Fund for ALS Research and the Max Rosenfeld Fund.

508

509 **AUTHOR CONTRIBUTIONS**

510 MPM and PMK synthesized and purified oligonucleotides; MPM, JMR-B, FW and AW carried out mouse  
511 experiments; FW, JMR-B and JKW developed the EvADINT scoring assay; MPM, JMR-B, M.Marosfoi, RMK  
512 and HG-E carried out the sheep study; M.Motwani and KAF developed the knockout mice, JKW  
513 supervised the study and wrote the manuscript; all authors edited the manuscript.

514

515 **COMPETING INTERESTS**

516 JKW is Scientific Advisory Board member of PepGen and ad hoc consultant for BridgeBio and Flagship  
517 Pioneering. RHB is co-founder and Scientific Advisory Board member of ApicBio.

518

519 **REFERENCES**

- 520 1. Seguin, R., Antisense Oligonucleotides for Treatment of Neurological Diseases. In  
521 *Oligonucleotide-Based Drugs and Therapeutics: Preclinical and Clinical Considerations for*  
522 *Development*. (eds. N. Ferrari & R. Seguin) 389-409 (Wiley, Hoboken; 2018).
- 523 2. Evers, M.M., Toonen, L.J. & van Roon-Mom, W.M. (2015). Antisense oligonucleotides in therapy  
524 for neurodegenerative disorders. *Adv Drug Deliv Rev* 87, 90-103.
- 525 3. Wahlestedt, C. (1994). Antisense oligonucleotide strategies in neuropharmacology. *Trends*  
526 *Pharmacol. Sci.* 15, 42-46.
- 527 4. Smith, R.A., Miller, T.M., Yamanaka, K., Monia, B.P., Condon, T.P., Hung, G., Lobsiger, C.S., Ward,  
528 C.M., McAlonis-Downes, M., Wei, H. et al. (2006). Antisense oligonucleotide therapy for  
529 neurodegenerative disease. *J. Clin. Invest.* 116, 2290-2296.
- 530 5. Aartsma-Rus, A. (2017). FDA Approval of Nusinersen for Spinal Muscular Atrophy Makes 2016  
531 the Year of Splice Modulating Oligonucleotides. *Nucleic Acid Ther* 27, 67-69.
- 532 6. Corey, D.R. (2017). Nusinersen, an antisense oligonucleotide drug for spinal muscular atrophy.  
533 *Nat. Neurosci.* 20, 497-499.
- 534 7. Hua, Y., Sahashi, K., Hung, G., Rigo, F., Passini, M.A., Bennett, C.F. & Krainer, A.R. (2010).  
535 Antisense correction of SMN2 splicing in the CNS rescues necrosis in a type III SMA mouse  
536 model. *Genes Dev.* 24, 1634-1644.
- 537 8. Passini, M.A., Bu, J., Richards, A.M., Kinnecom, C., Sardi, S.P., Stanek, L.M., Hua, Y., Rigo, F.,  
538 Matson, J., Hung, G. et al. (2011). Antisense Oligonucleotides Delivered to the Mouse CNS  
539 Ameliorate Symptoms of Severe Spinal Muscular Atrophy. *Sci. Trans. Med.* 3, 72ra18-72ra18.
- 540 9. Rigo, F., Hua, Y., Krainer, A.R. & Bennett, C.F. (2012). Antisense-based therapy for the treatment  
541 of spinal muscular atrophy. *J. Cell Biol.* 199, 21-25.
- 542 10. Singh, N.N., Howell, M.D., Androphy, E.J. & Singh, R.N. (2017). How the discovery of ISS-N1 led  
543 to the first medical therapy for spinal muscular atrophy. *Gene Ther.* 24, 520-526.
- 544 11. Finkel, R.S., Mercuri, E., Darras, B.T., Connolly, A.M., Kuntz, N.L., Kirschner, J., Chiriboga, C.A.,  
545 Saito, K., Servais, L., Tizzano, E. et al. (2017). Nusinersen versus Sham Control in Infantile-Onset  
546 Spinal Muscular Atrophy. *N. Engl. J. Med.* 377, 1723-1732.
- 547 12. Mercuri, E., Darras, B.T., Chiriboga, C.A., Day, J.W., Campbell, C., Connolly, A.M., Iannaccone,  
548 S.T., Kirschner, J., Kuntz, N.L., Saito, K. et al. (2018). Nusinersen versus Sham Control in Later-  
549 Onset Spinal Muscular Atrophy. *N. Engl. J. Med.* 378, 625-635.
- 550 13. Kordasiewicz, H.B., Stanek, L.M., Wancewicz, E.V., Mazur, C., McAlonis, M.M., Pytel, K.A.,  
551 Artates, J.W., Weiss, A., Cheng, S.H., Shihabuddin, L.S. et al. (2012). Sustained therapeutic  
552 reversal of Huntington's disease by transient repression of huntingtin synthesis. *Neuron* 74,  
553 1031-1044.
- 554 14. Tabrizi, S., Leavitt, B., Kordasiewicz, H., Czech, C., Swayze, E., Norris, D.A., Baumann, T., Gerlach,  
555 I., Schobel, S., Smith, A. et al. (2018). Effects of IONIS-HTTRx in Patients with Early Huntington's  
556 Disease, Results of the First HTT-Lowering Drug Trial (CT.002). *Neurology* 90.
- 557 15. Tabrizi, S.J., Leavitt, B.R., Landwehrmeyer, G.B., Wild, E.J., Saft, C., Barker, R.A., Blair, N.F.,  
558 Craufurd, D., Priller, J., Rickards, H. et al. (2019). Targeting Huntingtin Expression in Patients with  
559 Huntington's Disease. *N. Engl. J. Med.* 380, 2307-2316.
- 560 16. DeVos, S.L., Miller, R.L., Schoch, K.M., Holmes, B.B., Kebodeaux, C.S., Wegener, A.J., Chen, G.,  
561 Shen, T., Tran, H., Nichols, B. et al. (2017). Tau reduction prevents neuronal loss and reverses  
562 pathological tau deposition and seeding in mice with tauopathy. *Sci. Trans. Med.* 9, eaag0481.
- 563 17. Zhao, H.T., John, N., Delic, V., Ikeda-Lee, K., Kim, A., Weihofen, A., Swayze, E.E., Kordasiewicz,  
564 H.B., West, A.B. & Volpicelli-Daley, L.A. (2017). LRRK2 Antisense Oligonucleotides Ameliorate  $\alpha$ -  
565 Synuclein Inclusion Formation in a Parkinson's Disease Mouse Model. *Mol. Ther. Nucl. Acids* 8,  
566 508-519.

- 567 18. Jiang, J., Zhu, Q., Gendron, Tania F., Saberi, S., McAlonis-Downes, M., Seelman, A., Stauffer,  
568 Jennifer E., Jafar-nejad, P., Drenner, K., Schulte, D. et al. (2016). Gain of Toxicity from ALS/FTD-  
569 Linked Repeat Expansions in *C9ORF72* Is Alleviated by Antisense Oligonucleotides Targeting  
570 GGGGCC-Containing RNAs. *Neuron* *90*, 535-550.
- 571 19. Becker, L.A., Huang, B., Bieri, G., Ma, R., Knowles, D.A., Jafar-Nejad, P., Messing, J., Kim, H.J.,  
572 Soriano, A., Auburger, G. et al. (2017). Therapeutic reduction of ataxin-2 extends lifespan and  
573 reduces pathology in TDP-43 mice. *Nature* *544*, 367.
- 574 20. McCampbell, A., Cole, T., Wegener, A.J., Tomassy, G.S., Setnicka, A., Farley, B.J., Schoch, K.M.,  
575 Hoye, M.L., Shabsovich, M., Sun, L. et al. (2018). Antisense oligonucleotides extend survival and  
576 reverse decrement in muscle response in ALS models. *J. Clin. Invest.* *128*, 3558-3567.
- 577 21. Tran, H., Moazami, M.P., Yang, H., McKenna-Yasek, D., Douthwright, C., Pinto, C., Metterville, J.,  
578 Shin, M., Sanil, N., Dooley, C. et al. (2021). Potent mixed backbone antisense oligonucleotide  
579 safely suppresses expression of mutant *c9orf72* transcripts and polydipeptides: First in human  
580 pilot study. *Research Square* (preprint) DOI: [10.21203/rs.3.rs-211236/v1](https://doi.org/10.21203/rs.3.rs-211236/v1).
- 581 22. Khvorova, A. & Watts, J.K. (2017). The chemical evolution of oligonucleotide therapies of clinical  
582 utility. *Nature Biotechnology* *35*, 238-248.
- 583 23. Watts, J.K., The medicinal chemistry of antisense oligonucleotides. In *Oligonucleotide-Based*  
584 *Drugs and Therapeutics*. (eds. N. Ferrari & R. Seguin) 39-90 (Wiley, Hoboken; 2018).
- 585 24. Wan, W.B. & Seth, P.P. (2016). The medicinal chemistry of therapeutic oligonucleotides. *J. Med.*  
586 *Chem.* *59*, 9645-9667.
- 587 25. Moser, V.C. (2011). Functional Assays for Neurotoxicity Testing. *Toxicol. Pathol.* *39*, 36-45.
- 588 26. OECD GUIDELINE FOR THE TESTING OF CHEMICALS (1997). Test No. 424: Neurotoxicity Study in  
589 Rodents DOI [10.1787/20745788](https://doi.org/10.1787/20745788).
- 590 27. Murphy, V.A., Smith, Q.R. & Rapoport, S.I. (1986). Homeostasis of brain and cerebrospinal fluid  
591 calcium concentrations during chronic hypo- and hypercalcemia. *J. Neurochem.* *47*, 1735-1741.
- 592 28. In more recent unpublished work, we have identified that 5 mM calcium is a better  
593 concentration for this saturation protocol, since for some sequences 20 mM calcium leads to  
594 reduced solubility.
- 595 29. Town, T., Jeng, D., Alexopoulou, L., Tan, J. & Flavell, R.A. (2006). Microglia Recognize Double-  
596 Stranded RNA via TLR3. *The Journal of Immunology* *176*, 3804-3812.
- 597 30. Jiang, M., Zhang, S., Yang, Z., Lin, H., Zhu, J., Liu, L., Wang, W., Liu, S., Liu, W., Ma, Y. et al. (2018).  
598 Self-Recognition of an Inducible Host lncRNA by RIG-I Feedback Restricts Innate Immune  
599 Response. *Cell* *173*, 906-919.e913.
- 600 31. Kato, H., Takeuchi, O., Sato, S., Yoneyama, M., Yamamoto, M., Matsui, K., Uematsu, S., Jung, A.,  
601 Kawai, T., Ishii, K.J. et al. (2006). Differential roles of MDA5 and RIG-I helicases in the recognition  
602 of RNA viruses. *Nature* *441*, 101-105.
- 603 32. Toonen, L.J.A., Casaca-Carreira, J., Pellise-Tintore, M., Mei, H., Temel, Y., Jahanshahi, A. & van  
604 Roon-Mom, W.M.C. (2018). Intracerebroventricular Administration of a 2'-O-Methyl  
605 Phosphorothioate Antisense Oligonucleotide Results in Activation of the Innate Immune System  
606 in Mouse Brain. *Nucleic Acid Ther* *28*, 63-73.
- 607 33. Debacker, A.J., Sharma, V.K., Meda Krishnamurthy, P., O'Reilly, D., Greenhill, R. & Watts, J.K.  
608 (2019). Next-Generation Peptide Nucleic Acid Chimeras Exhibit High Affinity and Potent Gene  
609 Silencing. *Biochemistry* *58*, 582-589.
- 610 34. Ostergaard, M.E., Southwell, A.L., Kordasiewicz, H., Watt, A.T., Skotte, N.H., Doty, C.N., Vaid, K.,  
611 Villanueva, E.B., Swayze, E.E., Bennett, C.F. et al. (2013). Rational design of antisense  
612 oligonucleotides targeting single nucleotide polymorphisms for potent and allele selective  
613 suppression of mutant Huntingtin in the CNS. *Nucleic Acids Res* *41*, 9634-9650.

- 614 35. DeVos, S.L., Goncharoff, D.K., Chen, G., Kebodeaux, C.S., Yamada, K., Stewart, F.R., Schuler, D.R.,  
615 Maloney, S.E., Wozniak, D.F., Rigo, F. et al. (2013). Antisense Reduction of Tau in Adult Mice  
616 Protects against Seizures. *J. Neurosci.* *33*, 12887-12897.
- 617 36. Meng, L., Ward, A.J., Chun, S., Bennett, C.F., Beaudet, A.L. & Rigo, F. (2014). Towards a therapy  
618 for Angelman syndrome by targeting a long non-coding RNA. *Nature* *518*, 409.
- 619 37. Friedrich, J., Kordasiewicz, H.B., O'Callaghan, B., Handler, H.P., Wagener, C., Duvick, L., Swayze,  
620 E.E., Rainwater, O., Hofstra, B., Benneyworth, M. et al. (2018). Antisense oligonucleotide-  
621 mediated ataxin-1 reduction prolongs survival in SCA1 mice and reveals disease-associated  
622 transcriptome profiles. *JCI insight* *3*, e123193.
- 623 38. Luo, X., Fitzsimmons, B., Mohan, A., Zhang, L., Terrando, N., Kordasiewicz, H. & Ji, R.-R. (2018).  
624 Intrathecal administration of antisense oligonucleotide against p38 $\alpha$  but not p38 $\beta$  MAP kinase  
625 isoform reduces neuropathic and postoperative pain and TLR4-induced pain in male mice. *Brain*.  
626 *Behav. Immun.* *72*, 34-44.
- 627 39. Sztainberg, Y., Chen, H.M., Swann, J.W., Hao, S., Tang, B., Wu, Z., Tang, J., Wan, Y.W., Liu, Z.,  
628 Rigo, F. & Zoghbi, H.Y. (2015). Reversal of phenotypes in MECP2 duplication mice using genetic  
629 rescue or antisense oligonucleotides. *Nature* *528*, 123-126.
- 630 40. Moore, L.R., Rajpal, G., Dillingham, I.T., Qutob, M., Blumenstein, K.G., Gattis, D., Hung, G.,  
631 Kordasiewicz, H.B., Paulson, H.L. & McLoughlin, H.S. (2017). Evaluation of Antisense  
632 Oligonucleotides Targeting ATXN3 in SCA3 Mouse Models. *Mol. Ther. Nucl. Acids* *7*, 200-210.
- 633 41. Mohan, A., Fitzsimmons, B., Zhao, H.T., Jiang, Y., Mazur, C., Swayze, E.E. & Kordasiewicz, H.B.  
634 (2017). Antisense oligonucleotides selectively suppress target RNA in nociceptive neurons of the  
635 pain system and can ameliorate mechanical pain. *Pain* *159*, 139-149.
- 636 42. Ling, K.K., Jackson, M., Alkam, D., Liu, D., Allaire, N., Sun, C., Kiaei, M., McCampbell, A. & Rigo, F.  
637 (2018). Antisense-mediated reduction of EphA4 in the adult CNS does not improve the function  
638 of mice with amyotrophic lateral sclerosis. *Neurobiol. Dis.* *114*, 174-183.
- 639 43. Berridge, M.J. (1998). Neuronal Calcium Signaling. *Neuron* *21*, 13-26.
- 640 44. Brini, M., Cali, T., Ottolini, D. & Carafoli, E. (2014). Neuronal calcium signaling: function and  
641 dysfunction. *Cell. Mol. Life Sci.* *71*, 2787-2814.
- 642 45. Bosakowski, T. & Levin, A.A. (1987). Comparative acute toxicity of chlorocitrate and fluorocitrate  
643 in dogs. *Toxicology and Applied Pharmacology* *89*, 97-104.
- 644 46. Olson, R.E., Cacace, A.M., Hagedorn, P., Hog, A.M., Jensen, M.L., Nielsen, N.F., Li, D., Brown, J.M.  
645 & Mercer, S.E. (2016). Tau antisense oligomers and uses thereof. Patent application WO  
646 2016/126995 A1.
- 647 47. Brown, D.A., Kang, S.H., Gryaznov, S.M., DeDionisio, L., Heidenreich, O., Sullivan, S., Xu, X. &  
648 Nerenberg, M.I. (1994). Effect of phosphorothioate modification of oligodeoxynucleotides on  
649 specific protein binding. *Journal of Biological Chemistry* *269*, 26801-26805.
- 650 48. Lebedeva, I. & Stein, C.A. (2001). Antisense oligonucleotides: promise and reality. *Annual Review*  
651 *of Pharmacology and Toxicology* *41*, 403-419.
- 652 49. Levin, A.A., Yu, R.Z. & Geary, R.S., Basic Principles of the Pharmacokinetics of Antisense  
653 Oligonucleotide Drugs. In *Antisense Drug Technology: Principles, Strategies, and Applications*,  
654 Edn. 2nd. (ed. S.T. Crooke) 183-215 (CRC Press, Boca Raton; 2008).
- 655 50. Geary, R.S. (2009). Antisense oligonucleotide pharmacokinetics and metabolism. *Expert Opin*  
656 *Drug Met* *5*, 381-391.
- 657 51. Weidner, D.A., Valdez, B.C., Henning, D., Greenberg, S. & Busch, H. (1995). Phosphorothioate  
658 oligonucleotides bind in a non sequence-specific manner to the nucleolar protein C23/nucleolin.  
659 *FEBS Letters* *366*, 146-150.
- 660 52. Stein, C.A., Wu, S., Voskresenskiy, A.M., Zhou, J.F., Shin, J., Miller, P., Souleimanian, N. &  
661 Benimetskaya, L. (2009). G3139, an anti-Bcl-2 antisense oligomer that binds heparin-binding



- 662 growth factors and collagen I, alters in vitro endothelial cell growth and tubular morphogenesis.  
663 Clin. Cancer Res. 15, 2797-2807.
- 664 53. Miller, C.M., Donner, A.J., Blank, E.E., Egger, A.W., Kellar, B.M., Østergaard, M.E., Seth, P.P. &  
665 Harris, E.N. (2016). Stabilin-1 and Stabilin-2 are specific receptors for the cellular internalization  
666 of phosphorothioate-modified antisense oligonucleotides (ASOs) in the liver. Nucleic Acids  
667 Research 44, 2782-2794.
- 668 54. Wang, S., Allen, N., Vickers, T.A., Revenko, A.S., Sun, H., Liang, X.H. & Crooke, S.T. (2018).  
669 Cellular uptake mediated by epidermal growth factor receptor facilitates the intracellular  
670 activity of phosphorothioate-modified antisense oligonucleotides. Nucleic Acids Res 46, 3579-  
671 3594.
- 672 55. Hyjek-Skladanowska, M., Vickers, T.A., Napiorkowska, A., Anderson, B.A., Tanowitz, M., Crooke,  
673 S.T., Liang, X.H., Seth, P.P. & Nowotny, M. (2020). Origins of the Increased Affinity of  
674 Phosphorothioate-Modified Therapeutic Nucleic Acids for Proteins. J. Am. Chem. Soc. 142, 7456-  
675 7468.
- 676 56. Agrawal, S., Rustagi, P.K. & Shaw, D.R. (1995). Novel enzymatic and immunological responses to  
677 oligonucleotides. Toxicology Letters 82-83, 431-434.
- 678 57. Zhang, R., Iyer, R.P., Yu, D., Tan, W., Zhang, X., Lu, Z., Zhao, H. & Agrawal, S. (1996).  
679 Pharmacokinetics and tissue disposition of a chimeric oligodeoxynucleoside phosphorothioate in  
680 rats after intravenous administration. J. Pharmacol. Exp. Ther. 278, 971-979.
- 681 58. Zhao, Q., Tamsamani, J., Iadarola, P.L., Jiang, Z. & Agrawal, S. (1996). Effect of different  
682 chemically modified oligodeoxynucleotides on immune stimulation. Biochem. Pharmacol. 51,  
683 173-182.
- 684 59. Agrawal, S., Jiang, Z., Zhao, Q., Shaw, D., Sun, D. & Saxinger, C. (1997). Mixed-Backbone  
685 Oligonucleotides Containing Phosphorothioate and Methylphosphonate Linkages as Second  
686 Generation Antisense Oligonucleotide. Nucleosides Nucleotides 16, 927-936.
- 687 60. Henry, S.P., Kim, T.-W., Kramer-Stickland, K., Zanardi, T.A., Fey, R.A. & Levin, A.A., Toxicologic  
688 Properties of 2'-O-Methoxyethyl Chimeric Antisense Inhibitors in Animals and Man. In *Antisense  
689 Drug Technology: Principles, Strategies and Applications*. (ed. S.T. Crooke) 327-363 (CRC Press,  
690 Boca Raton; 2007).
- 691 61. Gaus, H.J., Gupta, R., Chappell, A.E., Østergaard, M.E., Swayze, E.E. & Seth, P.P. (2019).  
692 Characterization of the interactions of chemically-modified therapeutic nucleic acids with  
693 plasma proteins using a fluorescence polarization assay. Nucleic Acids Res 47, 1110-1122.
- 694 62. Shen, W., De Hoyos, C.L., Migawa, M.T., Vickers, T.A., Sun, H., Low, A., Bell, T.A., 3rd, Rahdar, M.,  
695 Mukhopadhyay, S., Hart, C.E. et al. (2019). Chemical modification of PS-ASO therapeutics  
696 reduces cellular protein-binding and improves the therapeutic index. Nat. Biotechnol. 37, 640-  
697 650.
- 698 63. Ferrari, N. & Seguin, R. (2012). Oligonucleotide inhibitors with chimeric backbone and 2-amino-  
699 2'-deoxyadenosine. PCT application PCT/CA2012/000169.
- 700 64. Kim, J., Hu, C., Moufawad El Achkar, C., Black, L.E., Douville, J., Larson, A., Pendergast, M.K.,  
701 Goldkind, S.F., Lee, E.A., Kuniholm, A. et al. (2019). Patient-Customized Oligonucleotide Therapy  
702 for a Rare Genetic Disease. N. Engl. J. Med. 381, 1644-1652.
- 703 65. Damha, M.J., Wilds, C.J., Noronha, A., Brukner, I., Borkow, G., Arion, D. & Parniak, M.A. (1998).  
704 Hybrids of RNA and arabinonucleic acids (ANA and 2'-F-ANA) are substrates of Ribonuclease H. J.  
705 Am. Chem. Soc. 120, 12976-12977.
- 706 66. Verbeure, B., Lescrinier, E., Wang, J. & Herdewijn, P. (2001). RNase H mediated cleavage of RNA  
707 by cyclohexene nucleic acid (CeNA). Nucleic Acids Research 29, 4941-4947.

- 708 67. Sharma, V.K., Singh, S.K., Krishnamurthy, P.M., Alterman, J.F., Haraszti, R.A., Khvorova, A.,  
709 Prasad, A.K. & Watts, J.K. (2017). Synthesis and biological properties of triazole-linked locked  
710 nucleic acid. *Chem. Commun.* 53, 8906-8909.
- 711 68. Adachi, O., Kawai, T., Takeda, K., Matsumoto, M., Tsutsui, H., Sakagami, M., Nakanishi, K. &  
712 Akira, S. (1998). Targeted disruption of the MyD88 gene results in loss of IL-1- and IL-18-  
713 mediated function. *Immunity* 9, 143-150.
- 714 69. Ishikawa, H. & Barber, G.N. (2008). STING is an endoplasmic reticulum adaptor that facilitates  
715 innate immune signalling. *Nature* 455, 674-678.
- 716 70. Coles, A.H., Osborn, M.F., Alterman, J.F., Turanov, A.A., Godinho, B.M., Kennington, L., Chase, K.,  
717 Aronin, N. & Khvorova, A. (2016). A High-Throughput Method for Direct Detection of  
718 Therapeutic Oligonucleotide-Induced Gene Silencing In Vivo. *Nucleic Acid Ther* 26, 86-92.

719
